# Supplementary material for: Shadow extraction and application in pedestrian detection
Source: Springer Nature journal article supplement (doi:10.1186/1687-5281-2014-12), 2014-02-24
Supplement: 13640_2013_151_MOESM3_ESM.pdf [file 13640_2013_151_MOESM3_ESM.pdf]

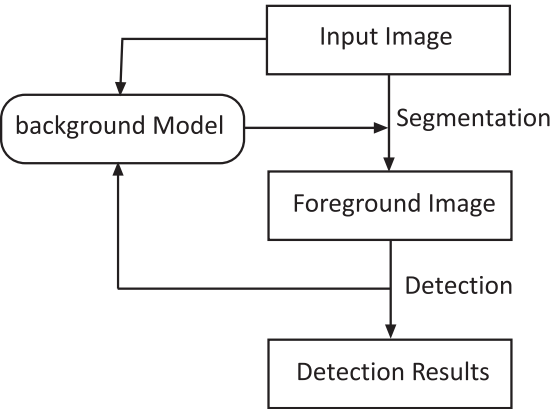

a

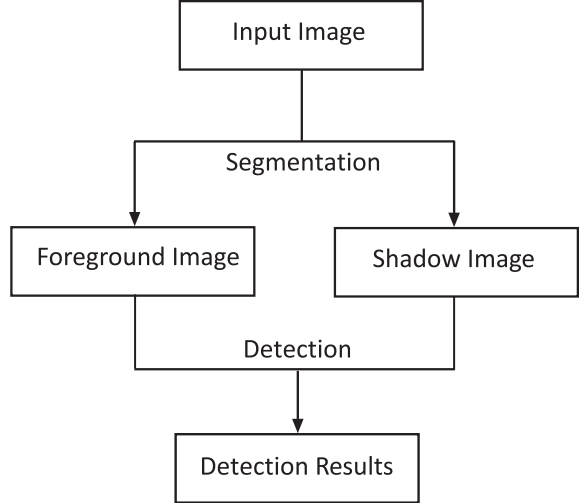

b
